# Supplementary material
Source: PubMed Central journal article supplement (PMC6933776)
Supplement: ao9b03145_si_001.pdf [file ao9b03145_si_001.pdf]

## **Supporting Informations**

### **Combined Use of SEM-EDXS and FTIR Imaging coupled with PCA Analysis in the Study of Ancient Egyptian Papyri**

**Cinzia Chiappe,<sup>a</sup> Christian Silvio Pomelli,<sup>a</sup> and Stefania Sartini<sup>a\*</sup>**

<sup>a</sup>Dipartimento di Farmacia, Università di Pisa, via Bonanno Pisano, 33, 56126, Pisa

Corresponding Author: [stefania.sartini@unipi.it](mailto:stefania.sartini@unipi.it)

SEM images and Energy-Dispersive X-ray spectra (EDX) page **S2-S10**

IR spectra of papyri samples page **S11-S14**

# Antinopolis

A

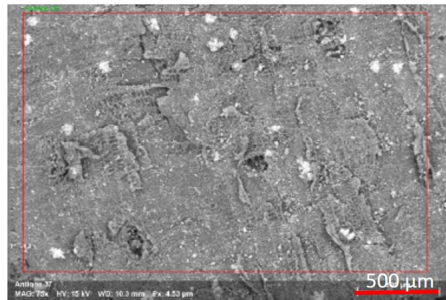

| Element    | At. No. | Netto | Mass [%]     | Mass Norm. [%] | Atom [%]      | abs. error [%] (1 sigma) |
|------------|---------|-------|--------------|----------------|---------------|--------------------------|
| Carbon     | 6       | 6153  | 38.97        | 39.13          | 49.47         | 5.91                     |
| Oxygen     | 8       | 7908  | 45.14        | 45.32          | 43.03         | 6.57                     |
| Sodium     | 11      | 1491  | 2.38         | 2.39           | 1.58          | 0.20                     |
| Magnesium  | 12      | 345   | 0.42         | 0.43           | 0.27          | 0.06                     |
| Aluminium  | 13      | 542   | 0.60         | 0.61           | 0.34          | 0.07                     |
| Silicon    | 14      | 2554  | 2.78         | 2.79           | 1.51          | 0.16                     |
| Phosphorus | 15      | 201   | 0.24         | 0.24           | 0.12          | 0.05                     |
| Sulfur     | 16      | 300   | 0.39         | 0.39           | 0.19          | 0.05                     |
| Chlorine   | 17      | 2733  | 4.29         | 4.30           | 1.84          | 0.20                     |
| Potassium  | 19      | 1131  | 1.58         | 1.58           | 0.61          | 0.10                     |
| Calcium    | 20      | 1395  | 2.55         | 2.56           | 0.97          | 0.13                     |
| Iron       | 26      | 46    | 0.26         | 0.26           | 0.07          | 0.07                     |
| <b>Sum</b> |         |       | <b>99.60</b> | <b>100.00</b>  | <b>100.00</b> |                          |

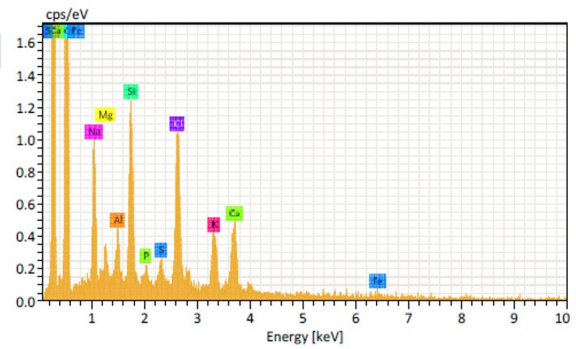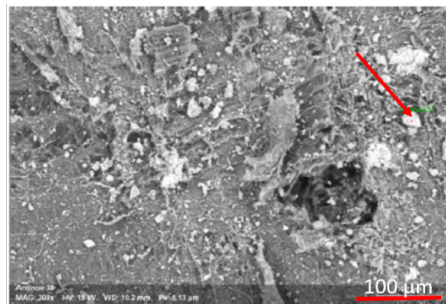

| Element    | At. No. | Netto | Mass [%]      | Mass Norm. [%] | Atom [%]      | abs. error [%] (1 sigma) |
|------------|---------|-------|---------------|----------------|---------------|--------------------------|
| Carbon     | 6       | 2415  | 17.26         | 15.69          | 23.96         | 3.16                     |
| Oxygen     | 8       | 17019 | 53.09         | 48.25          | 55.32         | 6.96                     |
| Sodium     | 11      | 903   | 1.35          | 1.23           | 0.98          | 0.13                     |
| Magnesium  | 12      | 4130  | 4.49          | 4.08           | 3.08          | 0.29                     |
| Aluminium  | 13      | 4286  | 4.16          | 3.78           | 2.57          | 0.24                     |
| Silicon    | 14      | 15990 | 14.71         | 13.37          | 8.74          | 0.66                     |
| Phosphorus | 15      | 187   | 0.19          | 0.17           | 0.10          | 0.04                     |
| Sulfur     | 16      | 202   | 0.20          | 0.19           | 0.11          | 0.04                     |
| Chlorine   | 17      | 1476  | 1.63          | 1.48           | 0.77          | 0.10                     |
| Potassium  | 19      | 2672  | 2.81          | 2.55           | 1.20          | 0.13                     |
| Calcium    | 20      | 938   | 1.29          | 1.17           | 0.54          | 0.09                     |
| Iron       | 26      | 2263  | 8.83          | 8.03           | 2.64          | 0.36                     |
| <b>Sum</b> |         |       | <b>110.02</b> | <b>100.00</b>  | <b>100.00</b> |                          |

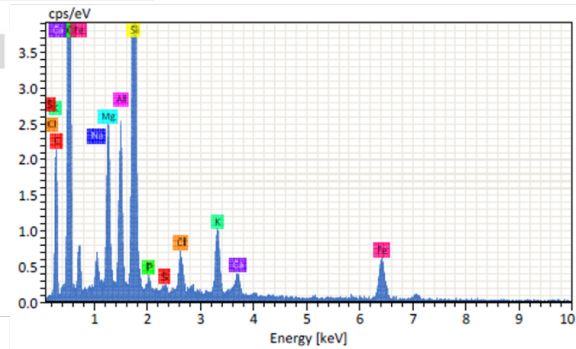

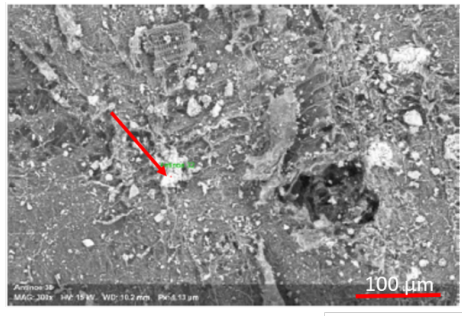

| Element   | At. No. | Netto      | Mass [%]     | Mass Norm. [%] | Atom [%]      | abs. error [%] (1 sigma) |
|-----------|---------|------------|--------------|----------------|---------------|--------------------------|
| Carbon    | 6       | 2257       | 22.81        | 26.19          | 43.72         | 4.23                     |
| Oxygen    | 8       | 2843       | 9.93         | 11.40          | 14.29         | 1.76                     |
| Sodium    | 11      | 35945      | 18.93        | 21.73          | 18.96         | 1.21                     |
| Magnesium | 12      | 209        | 0.12         | 0.13           | 0.11          | 0.04                     |
| Silicon   | 14      | 953        | 0.50         | 0.57           | 0.41          | 0.05                     |
| Sulfur    | 16      | 416        | 0.27         | 0.31           | 0.19          | 0.04                     |
| Chlorine  | 17      | 42385      | 32.86        | 37.72          | 21.34         | 1.13                     |
| Potassium | 19      | 547        | 0.70         | 0.81           | 0.41          | 0.07                     |
| Calcium   | 20      | 646        | 0.99         | 1.14           | 0.57          | 0.08                     |
|           |         | <b>Sum</b> | <b>87.10</b> | <b>100.00</b>  | <b>100.00</b> |                          |

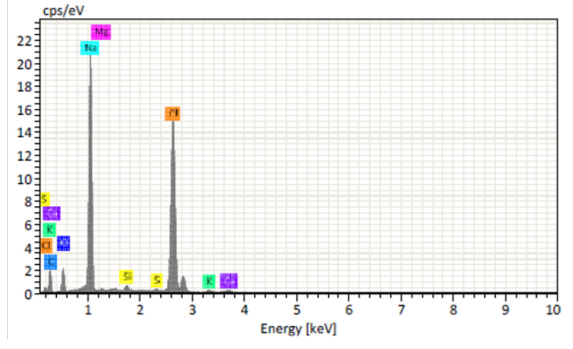

Figure S1. SEM-EDXS analysis of A papyrus

A'

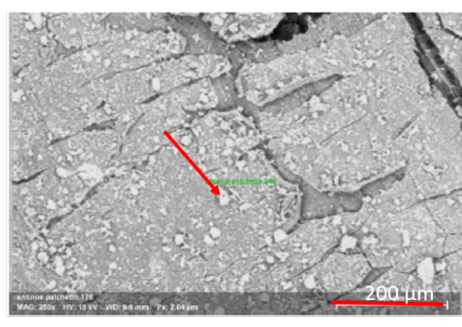

| Element    | At. No. | Netto      | Mass [%]     | Mass Norm. [%] | Atom [%]      | abs. error [%] (1 sigma) |
|------------|---------|------------|--------------|----------------|---------------|--------------------------|
| Carbon     | 6       | 693        | 13.84        | 15.48          | 23.36         | 3.51                     |
| Nitrogen   | 7       | 42         | 0.97         | 1.09           | 1.41          | 0.72                     |
| Oxygen     | 8       | 4883       | 41.14        | 46.04          | 52.16         | 6.49                     |
| Sodium     | 11      | 964        | 2.88         | 3.22           | 2.54          | 0.25                     |
| Magnesium  | 12      | 126        | 0.29         | 0.32           | 0.24          | 0.06                     |
| Aluminium  | 13      | 3418       | 6.98         | 7.81           | 5.25          | 0.39                     |
| Silicon    | 14      | 7546       | 15.84        | 17.72          | 11.44         | 0.73                     |
| Phosphorus | 15      | 2          | 0.00         | 0.00           | 0.00          | 0.00                     |
| Chlorine   | 17      | 227        | 0.64         | 0.72           | 0.37          | 0.08                     |
| Potassium  | 19      | 404        | 1.46         | 1.63           | 0.76          | 0.12                     |
| Calcium    | 20      | 880        | 3.79         | 4.25           | 1.92          | 0.21                     |
| Iron       | 26      | 132        | 1.53         | 1.71           | 0.56          | 0.18                     |
|            |         | <b>Sum</b> | <b>89.38</b> | <b>100.00</b>  | <b>100.00</b> |                          |

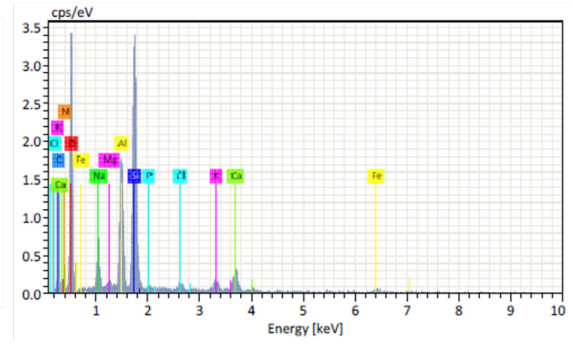

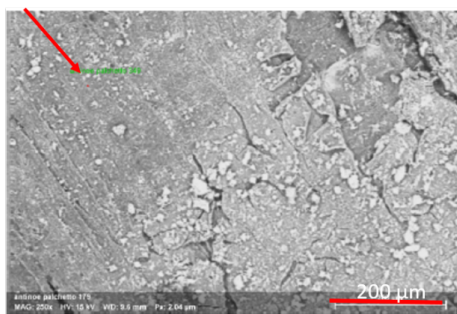

| Element    | At. No. | Netto        | Mass [%]      | Mass Norm. [%] | Atom [%]      | abs. error [%] (1 sigma) |
|------------|---------|--------------|---------------|----------------|---------------|--------------------------|
| Carbon     | 6       | 2667         | 35.01         | 43.80          | 53.49         | 6.24                     |
| Nitrogen   | 7       | 16           | 0.62          | 0.78           | 0.82          | 0.71                     |
| Oxygen     | 8       | 2608         | 34.59         | 43.29          | 39.68         | 6.19                     |
| Sodium     | 11      | 559          | 2.66          | 3.33           | 2.12          | 0.26                     |
| Magnesium  | 12      | 90           | 0.31          | 0.39           | 0.24          | 0.07                     |
| Aluminium  | 13      | 99           | 0.29          | 0.36           | 0.20          | 0.06                     |
| Silicon    | 14      | 627          | 1.63          | 2.04           | 1.07          | 0.13                     |
| Phosphorus | 15      | 45           | 0.12          | 0.15           | 0.07          | 0.04                     |
| Chlorine   | 17      | 1052         | 2.62          | 3.28           | 1.35          | 0.16                     |
| Potassium  | 19      | 468          | 1.51          | 1.90           | 0.71          | 0.12                     |
| Calcium    | 20      | 129          | 0.56          | 0.70           | 0.26          | 0.08                     |
| <b>Sum</b> |         | <b>79.92</b> | <b>100.00</b> | <b>100.00</b>  | <b>100.00</b> |                          |

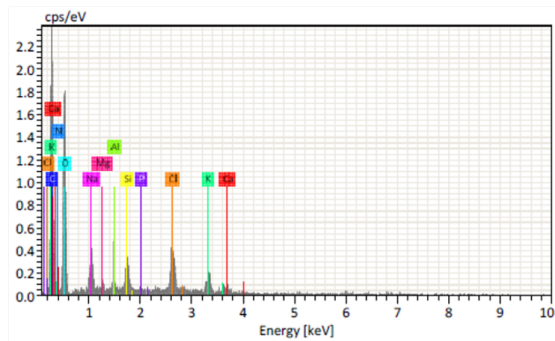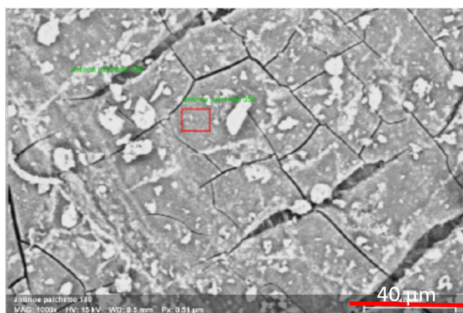

| Element    | At. No. | Netto        | Mass [%]      | Mass Norm. [%] | Atom [%]      | abs. error [%] (1 sigma) |
|------------|---------|--------------|---------------|----------------|---------------|--------------------------|
| Carbon     | 6       | 3097         | 36.00         | 36.64          | 46.24         | 6.21                     |
| Nitrogen   | 7       | 48           | 1.52          | 1.54           | 1.67          | 1.05                     |
| Oxygen     | 8       | 4292         | 47.49         | 48.33          | 45.80         | 7.67                     |
| Sodium     | 11      | 914          | 2.69          | 2.74           | 1.81          | 0.24                     |
| Magnesium  | 12      | 212          | 0.46          | 0.47           | 0.29          | 0.07                     |
| Aluminium  | 13      | 239          | 0.45          | 0.46           | 0.26          | 0.07                     |
| Silicon    | 14      | 389          | 0.68          | 0.69           | 0.37          | 0.08                     |
| Phosphorus | 15      | 362          | 0.66          | 0.67           | 0.33          | 0.07                     |
| Chlorine   | 17      | 808          | 2.90          | 2.95           | 1.26          | 0.18                     |
| Potassium  | 19      | 631          | 2.51          | 2.56           | 0.99          | 0.16                     |
| Calcium    | 20      | 336          | 1.61          | 1.63           | 0.62          | 0.13                     |
| Iron       | 26      | 100          | 1.29          | 1.31           | 0.36          | 0.17                     |
| <b>Sum</b> |         | <b>98.26</b> | <b>100.00</b> | <b>100.00</b>  | <b>100.00</b> |                          |

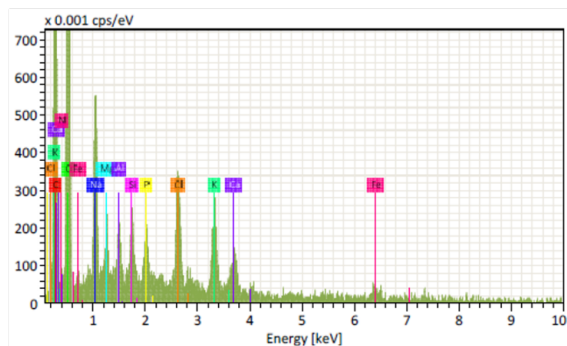

Figure S2. SEM-EDXS analysis of A' papyrus



# Tebtynis

## B

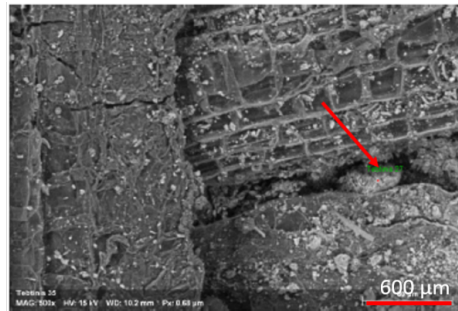

| Element    | At. No. | Netto | Mass [%]      | Mass Norm. [%] | Atom [%]      | abs. error [%] (1 sigma) |
|------------|---------|-------|---------------|----------------|---------------|--------------------------|
| Carbon     | 6       | 4541  | 31.11         | 29.30          | 38.94         | 4.98                     |
| Nitrogen   | 7       | 59    | 0.85          | 0.81           | 0.92          | 0.55                     |
| Oxygen     | 8       | 10536 | 53.89         | 50.75          | 50.63         | 7.51                     |
| Sodium     | 11      | 594   | 1.15          | 1.08           | 0.75          | 0.13                     |
| Magnesium  | 12      | 457   | 0.64          | 0.60           | 0.40          | 0.08                     |
| Aluminium  | 13      | 1991  | 2.42          | 2.27           | 1.35          | 0.16                     |
| Silicon    | 14      | 5405  | 6.22          | 5.86           | 3.33          | 0.31                     |
| Phosphorus | 15      | 97    | 0.12          | 0.11           | 0.06          | 0.04                     |
| Sulfur     | 16      | 96    | 0.11          | 0.10           | 0.05          | 0.04                     |
| Chlorine   | 17      | 1769  | 2.19          | 2.06           | 0.93          | 0.12                     |
| Potassium  | 19      | 552   | 0.90          | 0.85           | 0.35          | 0.08                     |
| Calcium    | 20      | 2599  | 5.08          | 4.79           | 1.91          | 0.22                     |
| Iron       | 26      | 286   | 1.51          | 1.42           | 0.41          | 0.13                     |
| <b>Sum</b> |         |       | <b>106.19</b> | <b>100.00</b>  | <b>100.00</b> |                          |

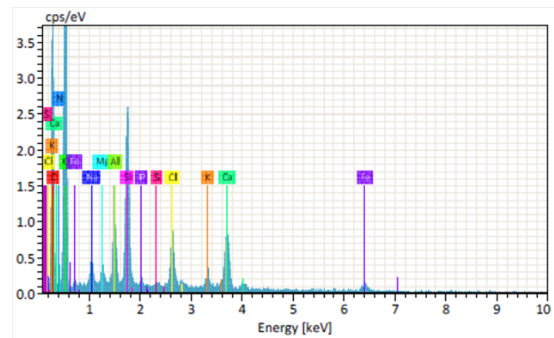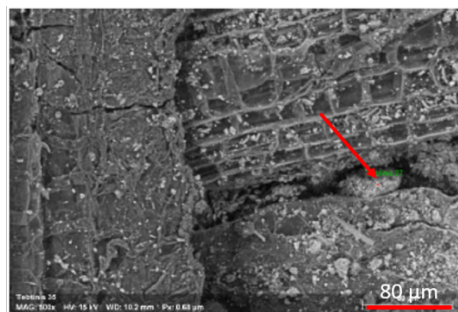

| Element    | At. No. | Netto | Mass [%]      | Mass Norm. [%] | Atom [%]      | abs. error [%] (1 sigma) |
|------------|---------|-------|---------------|----------------|---------------|--------------------------|
| Carbon     | 6       | 2661  | 16.50         | 15.47          | 23.01         | 2.95                     |
| Oxygen     | 8       | 14817 | 58.16         | 54.51          | 60.89         | 7.75                     |
| Sodium     | 11      | 422   | 0.62          | 0.59           | 0.46          | 0.08                     |
| Magnesium  | 12      | 846   | 0.90          | 0.84           | 0.62          | 0.09                     |
| Aluminium  | 13      | 4716  | 4.30          | 4.03           | 2.67          | 0.24                     |
| Silicon    | 14      | 10304 | 8.98          | 8.42           | 5.36          | 0.42                     |
| Sulfur     | 16      | 172   | 0.18          | 0.17           | 0.09          | 0.04                     |
| Chlorine   | 17      | 855   | 0.96          | 0.90           | 0.45          | 0.08                     |
| Potassium  | 19      | 715   | 0.96          | 0.90           | 0.41          | 0.08                     |
| Calcium    | 20      | 7644  | 12.76         | 11.96          | 5.33          | 0.44                     |
| Iron       | 26      | 556   | 2.36          | 2.21           | 0.71          | 0.16                     |
| <b>Sum</b> |         |       | <b>106.69</b> | <b>100.00</b>  | <b>100.00</b> |                          |

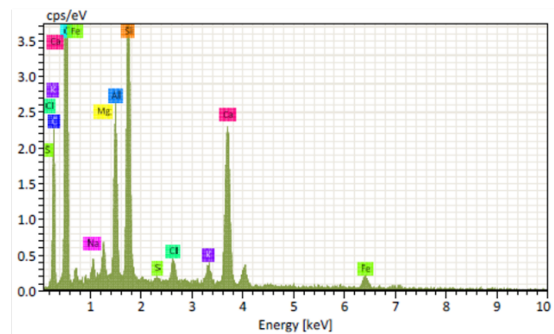

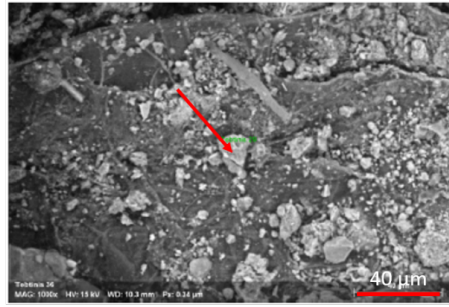

| Element    | At. No. | Netto        | Mass [%] | Mass Norm. [%] | Atom [%]      | abs. error [%] (1 sigma) |
|------------|---------|--------------|----------|----------------|---------------|--------------------------|
| Carbon     | 6       | 2042         | 17.30    | 19.72          | 29.34         | 3.29                     |
| Oxygen     | 8       | 10206        | 39.62    | 45.17          | 50.45         | 5.56                     |
| Sodium     | 11      | 285          | 0.43     | 0.49           | 0.38          | 0.07                     |
| Magnesium  | 12      | 448          | 0.49     | 0.56           | 0.41          | 0.07                     |
| Aluminium  | 13      | 7461         | 7.15     | 8.15           | 5.40          | 0.38                     |
| Silicon    | 14      | 13786        | 13.28    | 15.14          | 9.63          | 0.60                     |
| Phosphorus | 15      | 14           | 0.02     | 0.02           | 0.01          | 0.00                     |
| Sulfur     | 16      | 80           | 0.09     | 0.10           | 0.06          | 0.04                     |
| Chlorine   | 17      | 959          | 1.13     | 1.29           | 0.65          | 0.08                     |
| Potassium  | 19      | 955          | 1.47     | 1.68           | 0.77          | 0.10                     |
| Calcium    | 20      | 1791         | 3.15     | 3.59           | 1.60          | 0.15                     |
| Iron       | 26      | 769          | 3.60     | 4.11           | 1.31          | 0.21                     |
| <b>Sum</b> |         | <b>87.73</b> |          | <b>100.00</b>  | <b>100.00</b> |                          |

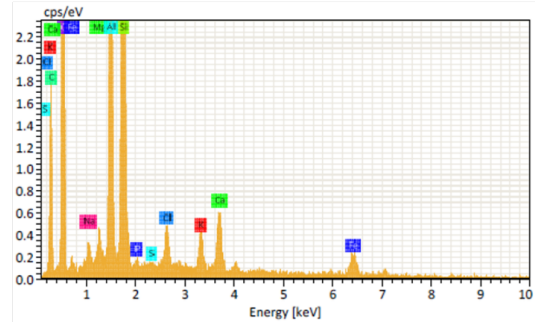

Figure S3. SEM-EDXS analysis of B papyrus

B'

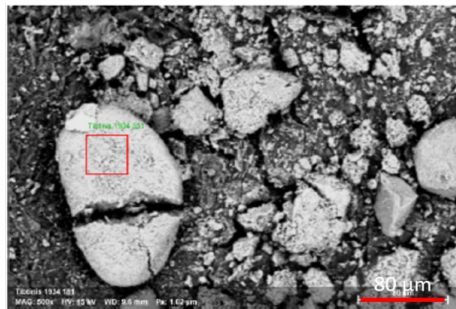

| Element    | At. No. | Netto         | Mass [%] | Mass Norm. [%] | Atom [%]      | abs. error [%] (1 sigma) |
|------------|---------|---------------|----------|----------------|---------------|--------------------------|
| Carbon     | 6       | 844           | 12.93    | 12.54          | 19.58         | 3.10                     |
| Nitrogen   | 7       | 51            | 1.45     | 1.40           | 1.88          | 0.98                     |
| Oxygen     | 8       | 4781          | 52.56    | 50.95          | 59.73         | 8.32                     |
| Sodium     | 11      | 247           | 0.85     | 0.82           | 0.67          | 0.12                     |
| Magnesium  | 12      | 327           | 0.80     | 0.77           | 0.60          | 0.10                     |
| Aluminium  | 13      | 1697          | 3.53     | 3.42           | 2.38          | 0.23                     |
| Silicon    | 14      | 3684          | 7.22     | 7.00           | 4.67          | 0.37                     |
| Phosphorus | 15      | 44            | 0.09     | 0.09           | 0.05          | 0.04                     |
| Sulfur     | 16      | 93            | 0.19     | 0.19           | 0.11          | 0.05                     |
| Chlorine   | 17      | 360           | 0.81     | 0.79           | 0.42          | 0.08                     |
| Potassium  | 19      | 250           | 0.91     | 0.88           | 0.42          | 0.09                     |
| Calcium    | 20      | 4290          | 18.61    | 18.04          | 8.45          | 0.67                     |
| Iron       | 26      | 283           | 3.21     | 3.11           | 1.04          | 0.26                     |
| <b>Sum</b> |         | <b>103.16</b> |          | <b>100.00</b>  | <b>100.00</b> |                          |

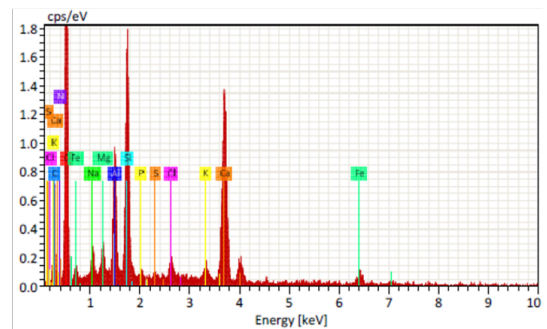

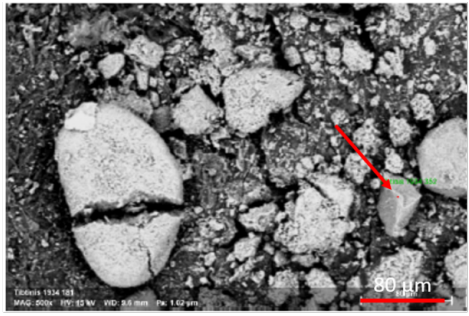

| Element   | At. No. | Netto      | Mass [%]     | Mass Norm. [%] | Atom [%]      | abs. error [%] (1 sigma) |
|-----------|---------|------------|--------------|----------------|---------------|--------------------------|
| Carbon    | 6       | 538        | 10.57        | 11.27          | 16.96         | 2.90                     |
| Oxygen    | 8       | 8266       | 50.69        | 54.07          | 61.06         | 7.32                     |
| Sodium    | 11      | 140        | 0.34         | 0.37           | 0.29          | 0.07                     |
| Aluminium | 13      | 561        | 0.91         | 0.97           | 0.65          | 0.09                     |
| Silicon   | 14      | 16893      | 29.18        | 31.13          | 20.02         | 1.28                     |
| Chlorine  | 17      | 243        | 0.57         | 0.61           | 0.31          | 0.07                     |
| Calcium   | 20      | 401        | 1.49         | 1.59           | 0.72          | 0.12                     |
|           |         | <b>Sum</b> | <b>93.76</b> | <b>100.00</b>  | <b>100.00</b> |                          |

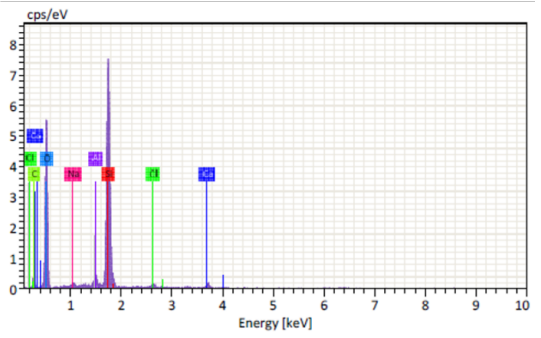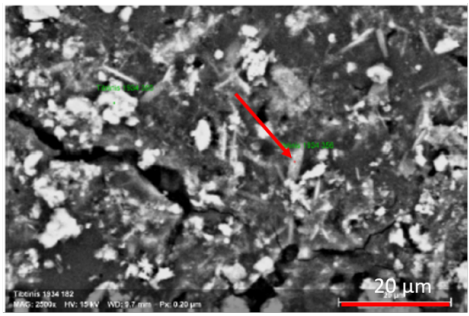

| Element    | At. No. | Netto      | Mass [%]      | Mass Norm. [%] | Atom [%]      | abs. error [%] (1 sigma) |
|------------|---------|------------|---------------|----------------|---------------|--------------------------|
| Carbon     | 6       | 1931       | 30.78         | 29.89          | 40.24         | 5.90                     |
| Oxygen     | 8       | 4316       | 49.24         | 47.81          | 48.32         | 7.95                     |
| Sodium     | 11      | 775        | 2.61          | 2.54           | 1.79          | 0.24                     |
| Magnesium  | 12      | 104        | 0.27          | 0.26           | 0.18          | 0.06                     |
| Aluminium  | 13      | 361        | 0.84          | 0.82           | 0.49          | 0.09                     |
| Silicon    | 14      | 2279       | 5.23          | 5.08           | 2.93          | 0.29                     |
| Phosphorus | 15      | 73         | 0.19          | 0.18           | 0.10          | 0.05                     |
| Sulfur     | 16      | 1462       | 4.09          | 3.97           | 2.00          | 0.22                     |
| Chlorine   | 17      | 839        | 2.88          | 2.80           | 1.28          | 0.18                     |
| Potassium  | 19      | 138        | 0.40          | 0.38           | 0.16          | 0.06                     |
| Calcium    | 20      | 1735       | 6.45          | 6.27           | 2.53          | 0.29                     |
|            |         | <b>Sum</b> | <b>102.98</b> | <b>100.00</b>  | <b>100.00</b> |                          |

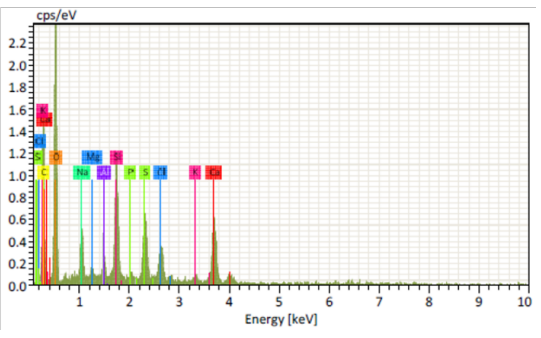

Figure S4. SEM-EDXS analysis of B' papyrus

# Oxyrhynchus

C

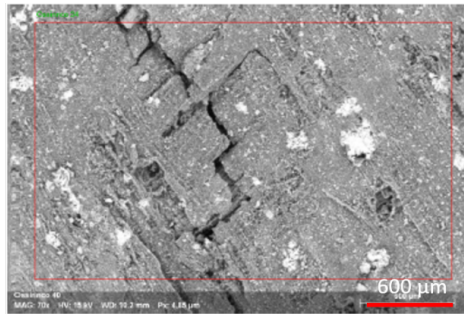

| Element    | At. No. | Netto      | Mass [%]      | Mass Norm. [%] | Atom [%]      | abs. error [%] (1 sigma) |
|------------|---------|------------|---------------|----------------|---------------|--------------------------|
| Carbon     | 6       | 5849       | 40.21         | 37.53          | 48.03         | 6.15                     |
| Oxygen     | 8       | 8180       | 49.01         | 45.75          | 43.95         | 7.09                     |
| Sodium     | 11      | 1582       | 2.85          | 2.66           | 1.78          | 0.24                     |
| Magnesium  | 12      | 337        | 0.46          | 0.43           | 0.27          | 0.07                     |
| Aluminium  | 13      | 615        | 0.74          | 0.69           | 0.39          | 0.08                     |
| Silicon    | 14      | 1966       | 2.26          | 2.11           | 1.15          | 0.14                     |
| Phosphorus | 15      | 151        | 0.18          | 0.17           | 0.09          | 0.04                     |
| Sulfur     | 16      | 350        | 0.45          | 0.42           | 0.20          | 0.06                     |
| Chlorine   | 17      | 3409       | 5.07          | 4.73           | 2.05          | 0.23                     |
| Potassium  | 19      | 1942       | 3.19          | 2.98           | 1.17          | 0.16                     |
| Calcium    | 20      | 1022       | 2.10          | 1.96           | 0.75          | 0.12                     |
| Iron       | 26      | 119        | 0.60          | 0.56           | 0.15          | 0.09                     |
|            |         | <b>Sum</b> | <b>107.13</b> | <b>100.00</b>  | <b>100.00</b> |                          |

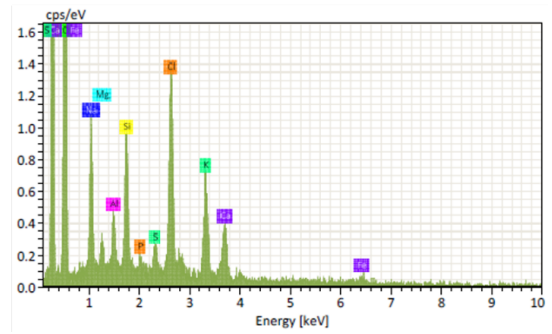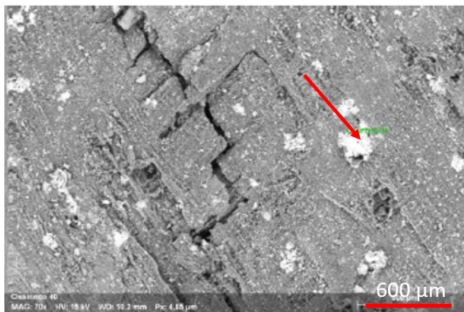

| Element   | At. No. | Netto      | Mass [%]     | Mass Norm. [%] | Atom [%]      | abs. error [%] (1 sigma) |
|-----------|---------|------------|--------------|----------------|---------------|--------------------------|
| Carbon    | 6       | 1697       | 21.32        | 22.28          | 39.06         | 4.23                     |
| Oxygen    | 8       | 2413       | 9.59         | 10.03          | 13.20         | 1.77                     |
| Sodium    | 11      | 36902      | 22.34        | 23.35          | 21.39         | 1.42                     |
| Aluminium | 13      | 263        | 0.20         | 0.21           | 0.16          | 0.04                     |
| Silicon   | 14      | 551        | 0.39         | 0.41           | 0.31          | 0.05                     |
| Chlorine  | 17      | 47554      | 40.57        | 42.41          | 25.19         | 1.39                     |
| Potassium | 19      | 611        | 0.80         | 0.84           | 0.45          | 0.07                     |
| Calcium   | 20      | 290        | 0.46         | 0.48           | 0.25          | 0.06                     |
|           |         | <b>Sum</b> | <b>95.67</b> | <b>100.00</b>  | <b>100.00</b> |                          |

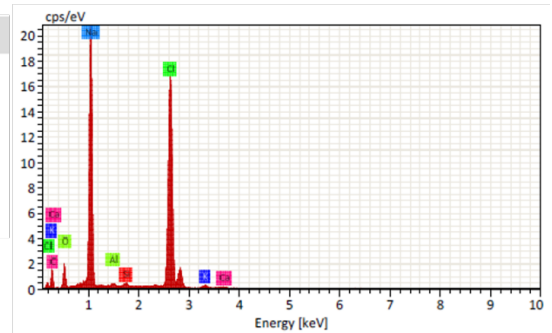



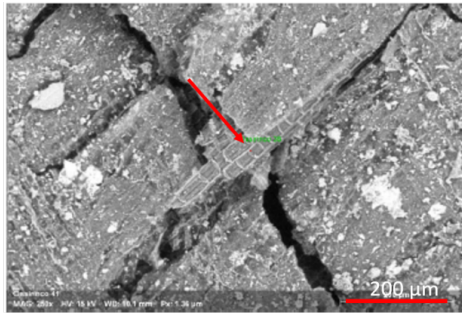

| Element    | At. No. | Netto        | Mass [%]      | Mass Norm. [%] | Atom [%]      | abs. error [%] (1 sigma) |
|------------|---------|--------------|---------------|----------------|---------------|--------------------------|
| Carbon     | 6       | 7169         | 44.78         | 44.84          | 55.48         | 6.62                     |
| Oxygen     | 8       | 6466         | 40.87         | 40.92          | 38.02         | 6.15                     |
| Sodium     | 11      | 1306         | 2.16          | 2.16           | 1.40          | 0.19                     |
| Magnesium  | 12      | 322          | 0.40          | 0.40           | 0.24          | 0.06                     |
| Aluminium  | 13      | 293          | 0.32          | 0.32           | 0.17          | 0.05                     |
| Silicon    | 14      | 957          | 0.98          | 0.98           | 0.52          | 0.08                     |
| Sulfur     | 16      | 193          | 0.23          | 0.23           | 0.11          | 0.05                     |
| Chlorine   | 17      | 3836         | 5.46          | 5.47           | 2.29          | 0.24                     |
| Potassium  | 19      | 2017         | 3.22          | 3.22           | 1.23          | 0.16                     |
| Calcium    | 20      | 766          | 1.46          | 1.46           | 0.54          | 0.10                     |
| <b>Sum</b> |         | <b>99.87</b> | <b>100.00</b> | <b>100.00</b>  | <b>100.00</b> |                          |

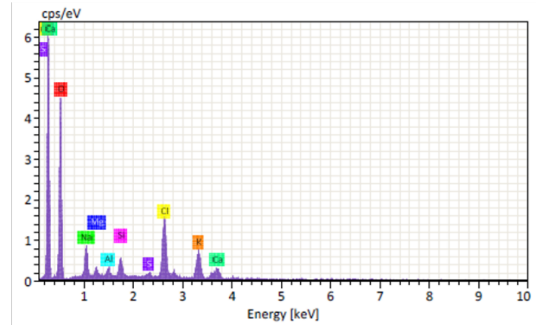

Figure S5. SEM-EDXS analysis of C papyrus

C'

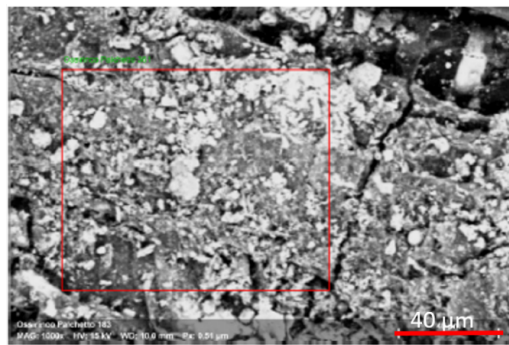

| Element    | At. No. | Netto        | Mass [%]      | Mass Norm. [%] | Atom [%]      | abs. error [%] (1 sigma) |
|------------|---------|--------------|---------------|----------------|---------------|--------------------------|
| Carbon     | 6       | 1848         | 35.90         | 36.42          | 48.36         | 6.96                     |
| Oxygen     | 8       | 2353         | 38.69         | 39.25          | 39.13         | 7.08                     |
| Sodium     | 11      | 835          | 3.83          | 3.89           | 2.70          | 0.34                     |
| Magnesium  | 12      | 166          | 0.60          | 0.61           | 0.40          | 0.09                     |
| Aluminium  | 13      | 408          | 1.33          | 1.35           | 0.80          | 0.13                     |
| Silicon    | 14      | 1242         | 3.98          | 4.04           | 2.29          | 0.25                     |
| Phosphorus | 15      | 136          | 0.48          | 0.49           | 0.25          | 0.08                     |
| Sulfur     | 16      | 469          | 1.79          | 1.81           | 0.90          | 0.14                     |
| Chlorine   | 17      | 1274         | 5.85          | 5.93           | 2.67          | 0.30                     |
| Potassium  | 19      | 1237         | 3.51          | 3.56           | 1.45          | 0.18                     |
| Calcium    | 20      | 704          | 2.61          | 2.65           | 1.05          | 0.16                     |
| <b>Sum</b> |         | <b>98.57</b> | <b>100.00</b> | <b>100.00</b>  | <b>100.00</b> |                          |

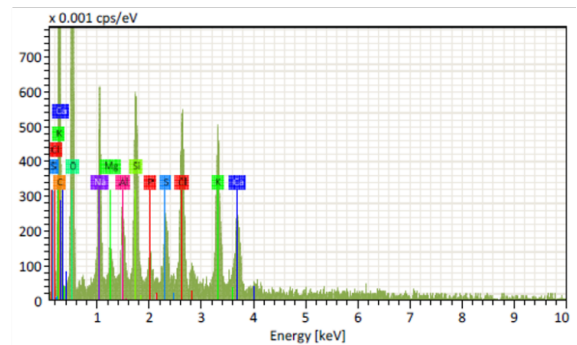



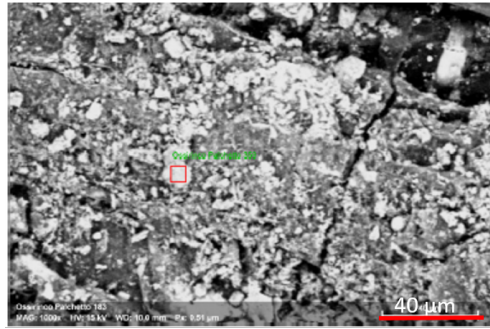

| Element    | At. No. | Netto        | Mass [%]      | Mass Norm. [%] | Atom [%]      | abs. error [%] (1 sigma) |
|------------|---------|--------------|---------------|----------------|---------------|--------------------------|
| Carbon     | 6       | 998          | 21.96         | 24.21          | 35.52         | 5.00                     |
| Oxygen     | 8       | 2921         | 36.73         | 40.50          | 44.60         | 6.42                     |
| Sodium     | 11      | 412          | 1.65          | 1.82           | 1.39          | 0.18                     |
| Magnesium  | 12      | 199          | 0.59          | 0.65           | 0.47          | 0.09                     |
| Aluminium  | 13      | 2635         | 6.85          | 7.56           | 4.93          | 0.40                     |
| Silicon    | 14      | 3762         | 9.79          | 10.79          | 6.77          | 0.49                     |
| Phosphorus | 15      | 91           | 0.26          | 0.29           | 0.16          | 0.06                     |
| Sulfur     | 16      | 130          | 0.37          | 0.41           | 0.22          | 0.06                     |
| Chlorine   | 17      | 549          | 1.73          | 1.91           | 0.95          | 0.13                     |
| Potassium  | 19      | 1481         | 6.59          | 7.26           | 3.27          | 0.31                     |
| Calcium    | 20      | 313          | 1.66          | 1.83           | 0.80          | 0.14                     |
| Titanium   | 22      | 58           | 0.40          | 0.44           | 0.16          | 0.08                     |
| Iron       | 26      | 195          | 2.12          | 2.34           | 0.74          | 0.20                     |
| <b>Sum</b> |         | <b>90.71</b> | <b>100.00</b> | <b>100.00</b>  | <b>100.00</b> |                          |

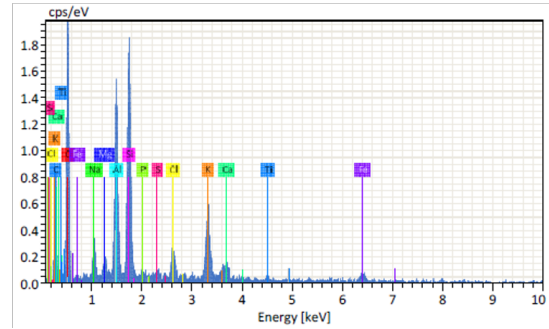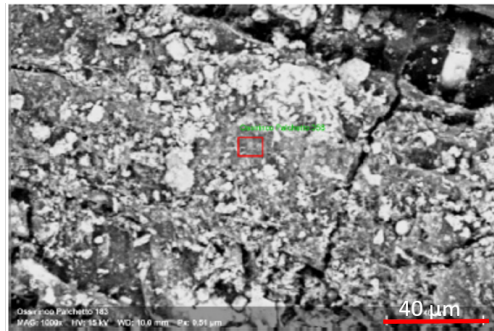

| Element    | At. No. | Netto         | Mass [%]      | Mass Norm. [%] | Atom [%]      | abs. error [%] (1 sigma) |
|------------|---------|---------------|---------------|----------------|---------------|--------------------------|
| Carbon     | 6       | 1952          | 48.56         | 42.72          | 56.35         | 9.28                     |
| Oxygen     | 8       | 1974          | 33.94         | 29.86          | 29.57         | 6.47                     |
| Sodium     | 11      | 1600          | 7.64          | 6.72           | 4.63          | 0.59                     |
| Magnesium  | 12      | 138           | 0.51          | 0.45           | 0.29          | 0.09                     |
| Aluminium  | 13      | 271           | 0.85          | 0.75           | 0.44          | 0.10                     |
| Silicon    | 14      | 845           | 2.39          | 2.10           | 1.19          | 0.17                     |
| Phosphorus | 15      | 117           | 0.34          | 0.30           | 0.15          | 0.06                     |
| Sulfur     | 16      | 161           | 0.45          | 0.40           | 0.20          | 0.07                     |
| Chlorine   | 17      | 4371          | 13.46         | 11.84          | 5.29          | 0.54                     |
| Potassium  | 19      | 838           | 3.10          | 2.73           | 1.11          | 0.18                     |
| Calcium    | 20      | 401           | 1.79          | 1.57           | 0.62          | 0.14                     |
| Iron       | 26      | 57            | 0.63          | 0.56           | 0.16          | 0.12                     |
| <b>Sum</b> |         | <b>113.67</b> | <b>100.00</b> | <b>100.00</b>  | <b>100.00</b> |                          |

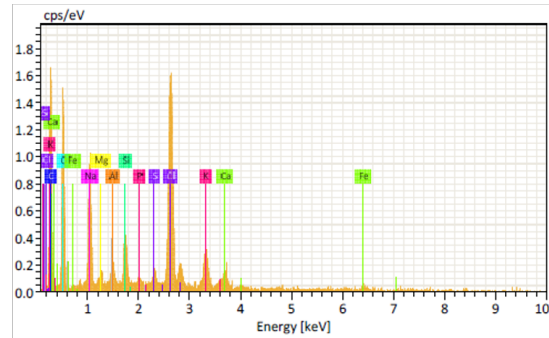

Figure S6. SEM-EDXS analysis of C' papyrus

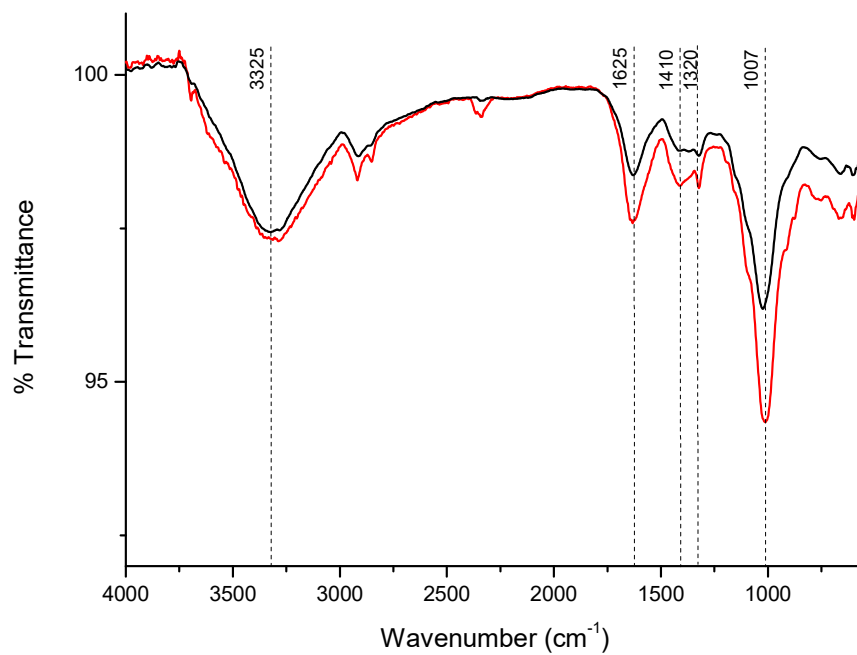

Figure S7. A. Antioe with ink (red) and without ink (black)

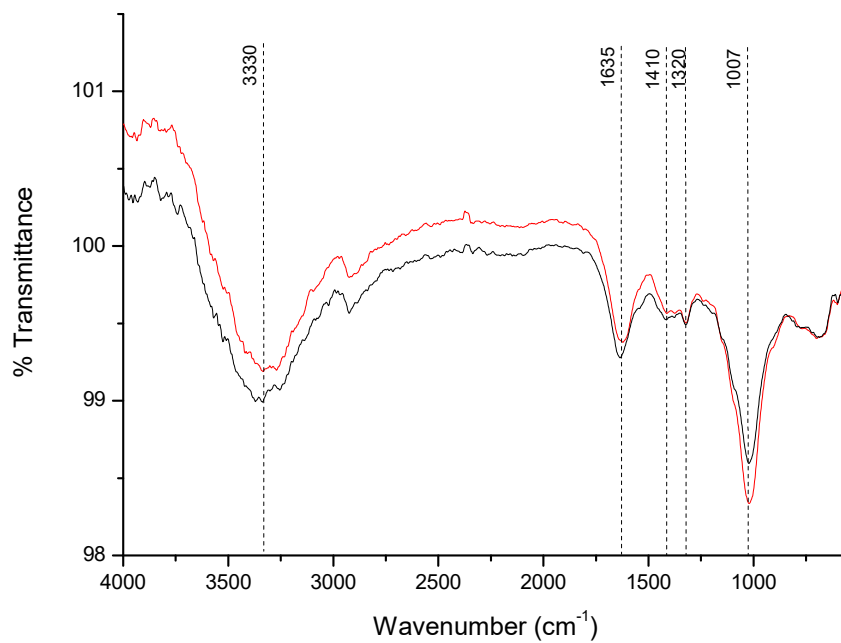

Figure S8. A' Antioe with ink (red) and without ink (black)

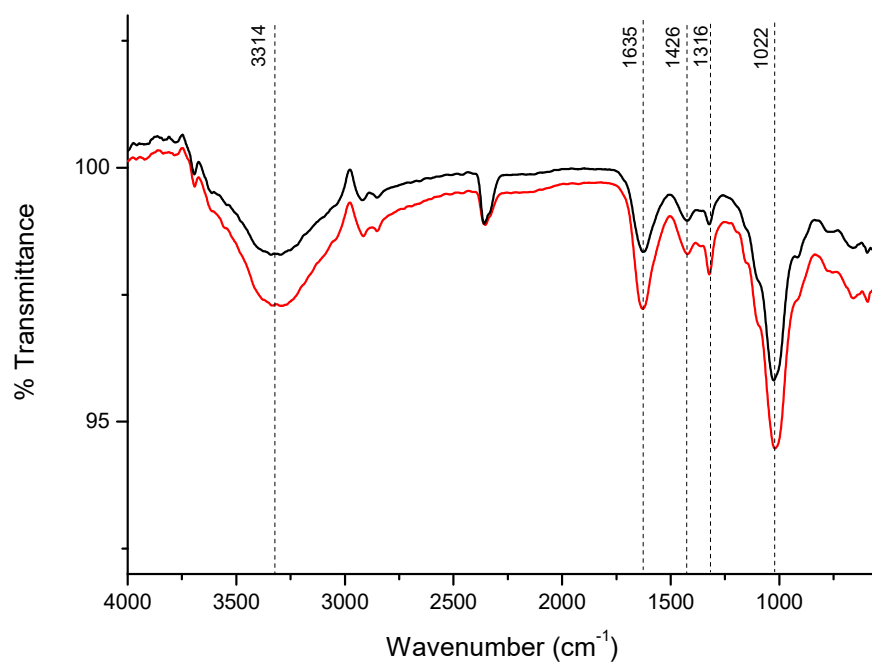

Figure S9. B Tebtynis with ink (red) and without ink (black)

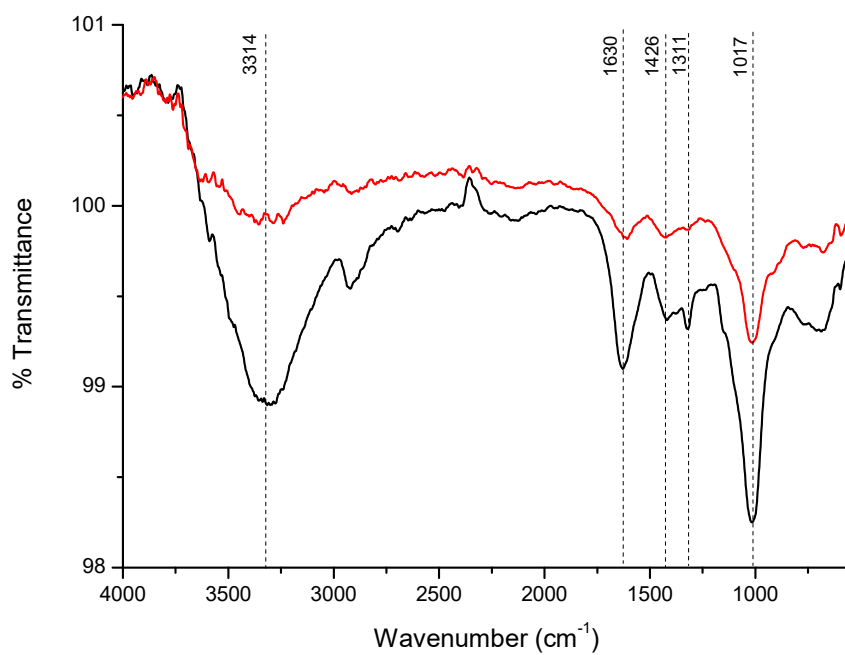

Figure S10. B' Tebtynis with ink (red) and without ink (black)

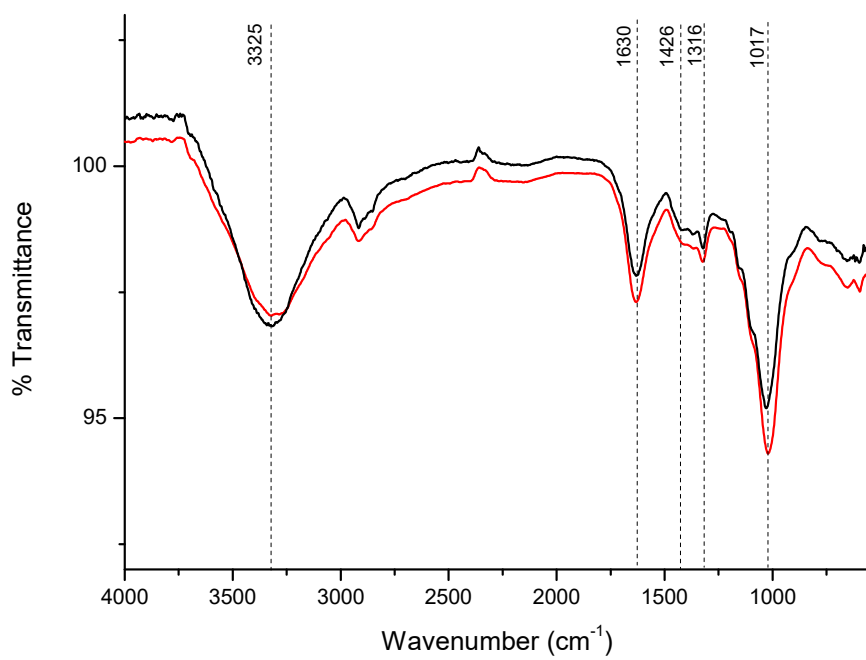

Figure S11. C Oxyrhynchus with ink (red) and without ink (black)

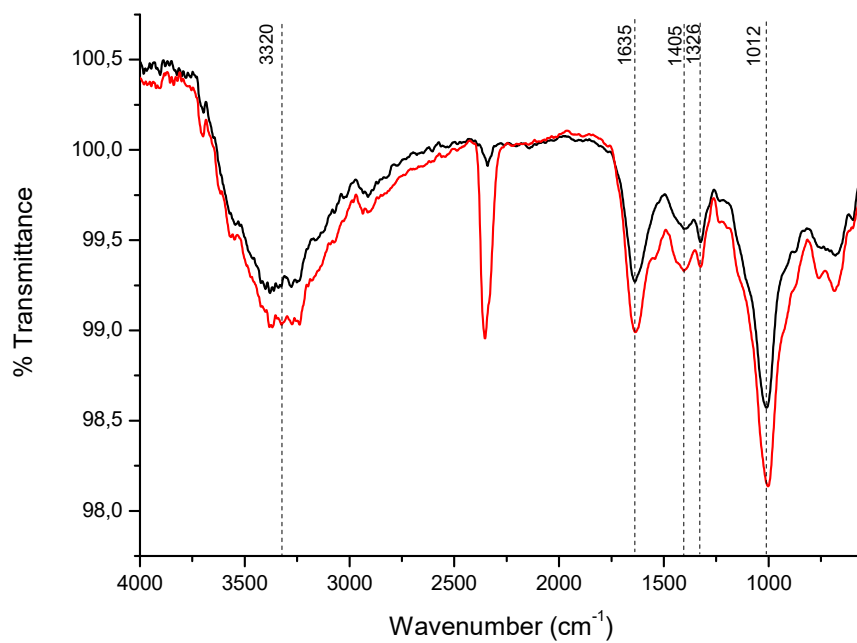

Figure S12. C' Oxyrhinchus with ink (red) and without ink (black)
